# Supplementary material for: Competition between dispersion interactions and conventional hydrogen bonding: insights from a theoretical study on Z-Arg-OH
Source: Royal Society of Chemistry journal article supplement (doi:10.1039/c9cp03130h), 2019-01-01
Supplement: c9cp03130h5.pdf [file c9cp03130h5.pdf]

Electronic Supplementary Information for

**Competition between Dispersion Interactions and Conventional  
Hydrogen Bonding: Insights from a Theoretical Study on Z-Arg-OH**

Hongbao Li,<sup>\*a,b</sup> Zhiqiang Wang,<sup>a</sup> Jun Jiang<sup>b</sup> and Yi Luo<sup>b</sup>

<sup>a</sup>. Institutes of Physical Science and Information Technology, Key Laboratory of Structure and Functional Regulation of Hybrid Materials, Ministry of Education. Anhui University, Hefei, Anhui, 230601, China.

<sup>b</sup>. Hefei National Laboratory for Physical Sciences at the Microscale, School of Chemistry and Materials Science, University of Science and Technology of China, Hefei, Anhui, 230026, China.

\*Correspondence to: [lihb@mail.ustc.edu.cn](mailto:lihb@mail.ustc.edu.cn)

**Table S1** Energy values (in kcal mol<sup>-1</sup>) of the noncovalent interaction from the energy decomposition analysis between the three different parts: the guanidine group (P<sub>1</sub>), the benzene group (P<sub>3</sub>) and the middle part (P<sub>2</sub>), including the peptide bond and the carboxylate group in conformer AT<sub>11</sub> and AC<sub>12</sub>.

|                  |                                   | Electrostatic | Repulsion | Dispersion | Total |
|------------------|-----------------------------------|---------------|-----------|------------|-------|
| AT <sub>11</sub> | P <sub>1</sub> and P <sub>3</sub> | 0.62          | 0.12      | -1.03      | -0.29 |
|                  | P <sub>1</sub> and P <sub>2</sub> | -10.84        | 7.00      | -5.21      | -9.06 |
| AC <sub>12</sub> | P <sub>1</sub> and P <sub>3</sub> | -0.52         | 0.02      | -0.37      | -0.87 |
|                  | P <sub>1</sub> and P <sub>2</sub> | -7.89         | 8.19      | -7.87      | -7.56 |

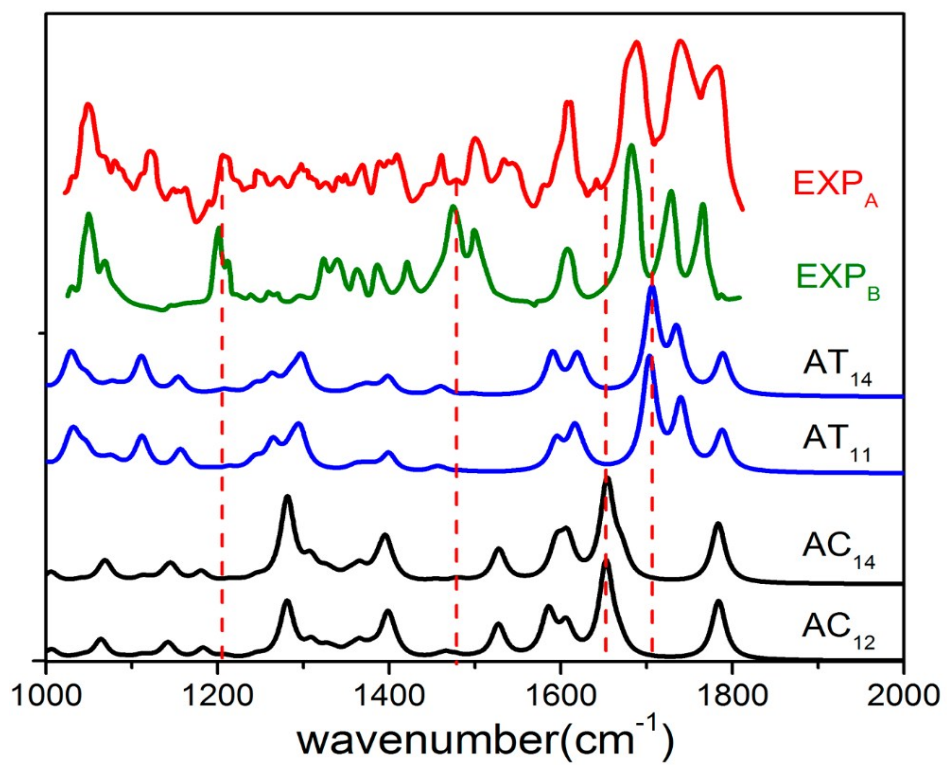

**Fig. S1** Simulated IR spectra of the most stable folded structures AC<sub>12</sub>, AC<sub>14</sub>, AT<sub>11</sub> and AT<sub>14</sub> at the B3LYP-D3 level with experimental results EXP<sub>A</sub> and EXP<sub>B</sub> for comparison. A Lorentzian profile with a FWHM of 20 cm<sup>-1</sup> is used to convolute the calculated spectra.

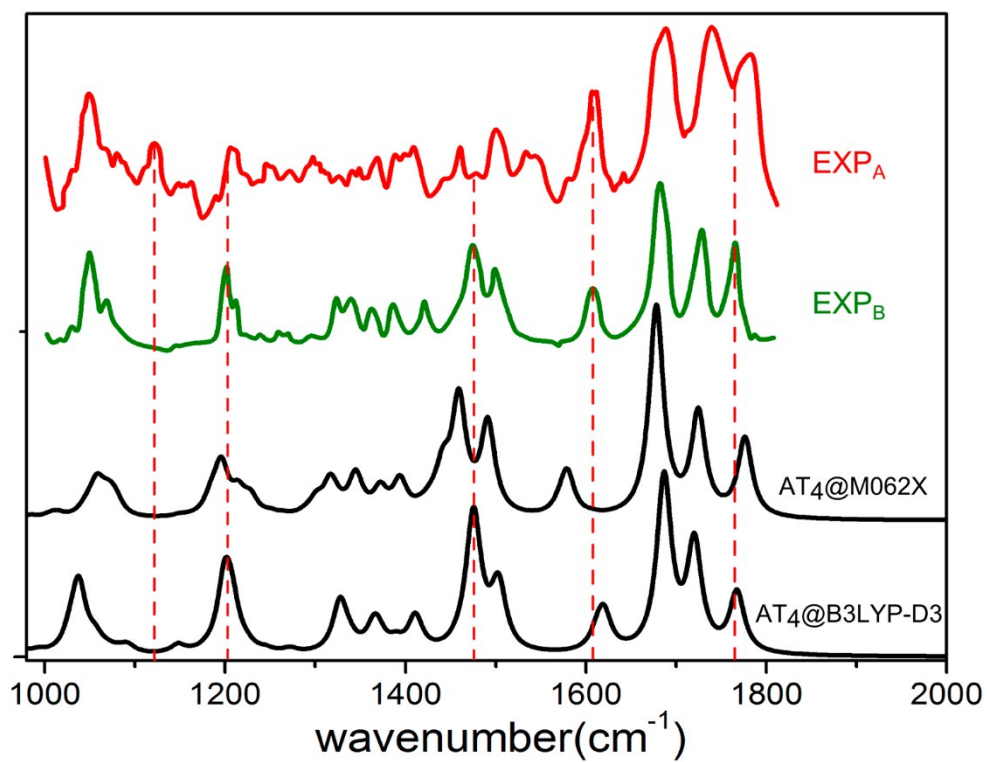

**Fig. S2** Simulated IR spectra of conformer AT<sub>4</sub> at the B3LYP-D3 and M062X level with experimental results EXP<sub>A</sub> and EXP<sub>B</sub> for comparison. A Lorentzian profile with a FWHM of 20 cm<sup>-1</sup> is used to convolute the calculated spectra.

**Table S2** Conformers with low Gibbs free energy of the three different isomers (AC<sub>1</sub>, AT<sub>1</sub>-AT<sub>5</sub>, AZ<sub>1</sub>) of Z-Arg-OH, together with their respective percent abundances at four different temperatures: 350, 300, 250 and 200 K.

| conformer       | Percent (%) |       |       |       |
|-----------------|-------------|-------|-------|-------|
|                 | 350 K       | 300 K | 250 K | 200 K |
| AC <sub>1</sub> | 0.32        | 0.20  | 0.10  | 0.03  |
| AT <sub>1</sub> | 19.57       | 22.18 | 25.22 | 29.23 |
| AT <sub>2</sub> | 16.73       | 18.87 | 21.34 | 24.55 |
| AT <sub>3</sub> | 11.57       | 13.18 | 15.07 | 17.59 |
| AT <sub>4</sub> | 22.78       | 21.45 | 18.82 | 14.87 |
| AT <sub>5</sub> | 20.92       | 19.25 | 16.37 | 12.40 |
| AZ <sub>1</sub> | 0.80        | 0.40  | 0.20  | 0.05  |

Note: the abundances were calculated using the DSD-PBEP86-D3(BJ)/aug-cc-pVTZ electronic energies and Gibbs free energy corrections at the B3LYP-D3(BJ)/6-311++G (d, p) level of theory.

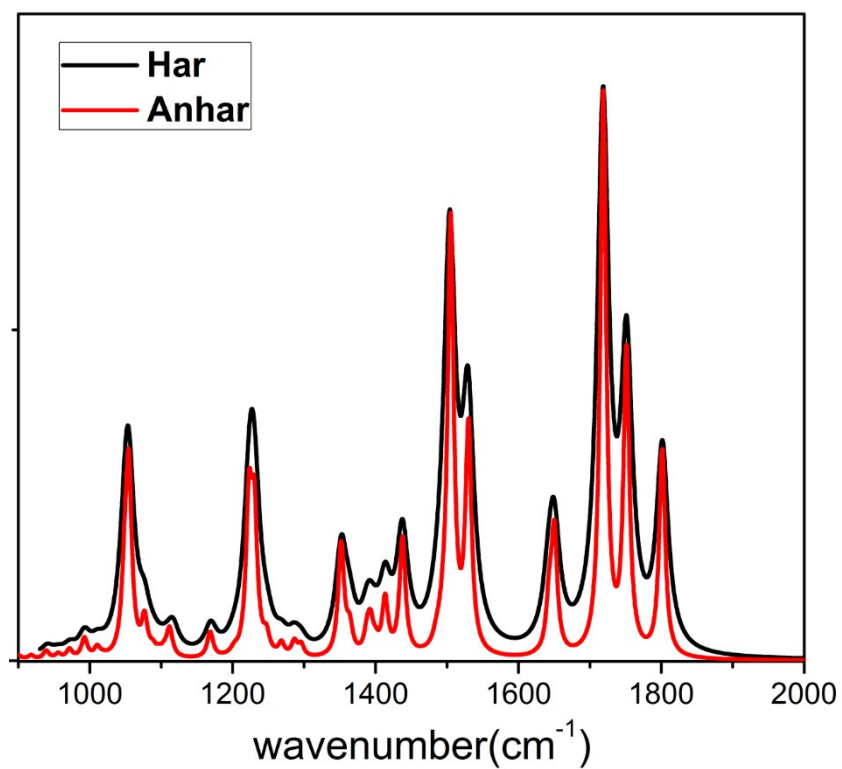

**Fig. S3** The computed IR spectrum of representative conformer AT<sub>1</sub> in the anharmonic motion (red) and the calibrated harmonic motion (black, scaling factor: 0.9813) at the B3LYP(BJ)/6-311++G (d, p) level. A Lorentzian profile with a FWHM of 20 cm<sup>-1</sup> is used to convolute the calculated spectra.

**Table S3** Conformers with low Gibbs free energy of the three different isomers (AC<sub>3</sub>, AT<sub>1</sub>-AT<sub>5</sub>, AZ<sub>3</sub>) of Z-Arg-OH, together with their respective percent abundances at 498 K.

| Conf.       | AC <sub>3</sub> | AT <sub>1</sub> | AT <sub>2</sub> | AT <sub>3</sub> | AT <sub>4</sub> | AT <sub>5</sub> | AZ <sub>3</sub> |
|-------------|-----------------|-----------------|-----------------|-----------------|-----------------|-----------------|-----------------|
| Percent (%) | 1.05            | 14.70           | 12.71           | 8.59            | 23.86           | 22.94           | 2.06            |

Note: the abundances were calculated using the DSD-PBEP86-D3(BJ)/aug-cc-pVTZ electronic energies and Gibbs free energy corrections at the B3LYP-D3(BJ)/6-311++G (d, p) level of theory.
