# Supplementary figures and images for: Competition between dispersion interactions and conventional hydrogen bonding: insights from a theoretical study on Z-Arg-OH
Source: Royal Society of Chemistry journal article supplement (doi:10.1039/c9cp03130h), 2019-01-01

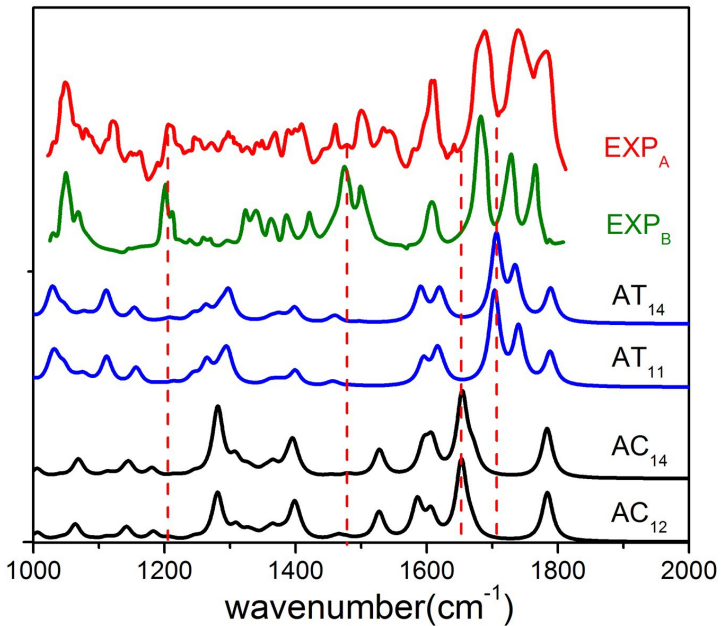

Supplement: c9cp03130h2.pdf [file c9cp03130h2.pdf]

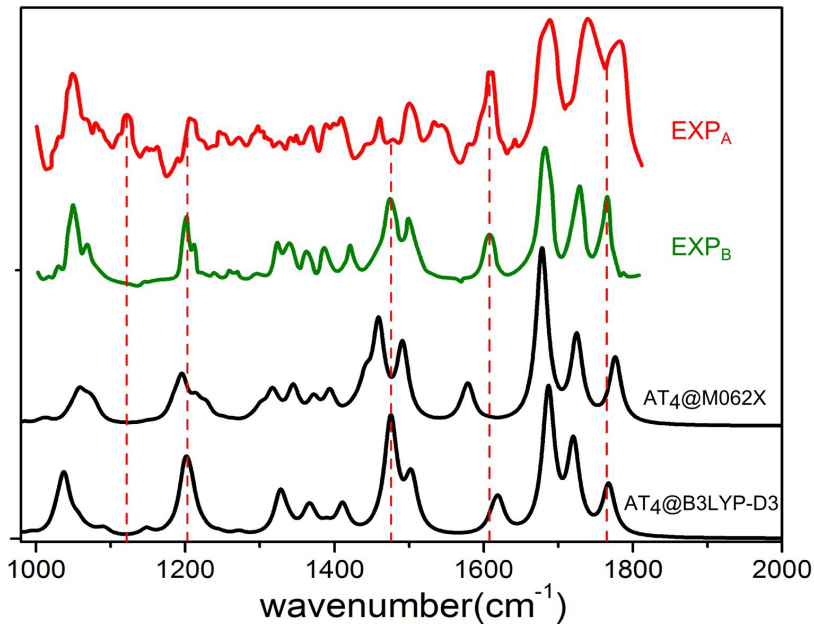

Supplement: c9cp03130h3.pdf [file c9cp03130h3.pdf]

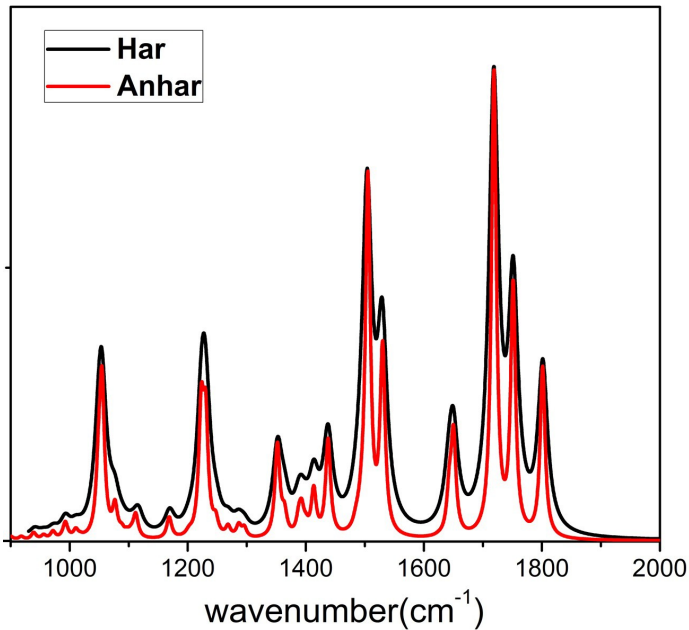

Supplement: c9cp03130h4.pdf [file c9cp03130h4.pdf]
